# Supplementary material
Source: PubMed Central journal article supplement (PMC9810661)
Supplement: 41422_2022_751_MOESM1_ESM.pdf [file 41422_2022_751_MOESM1_ESM.pdf]

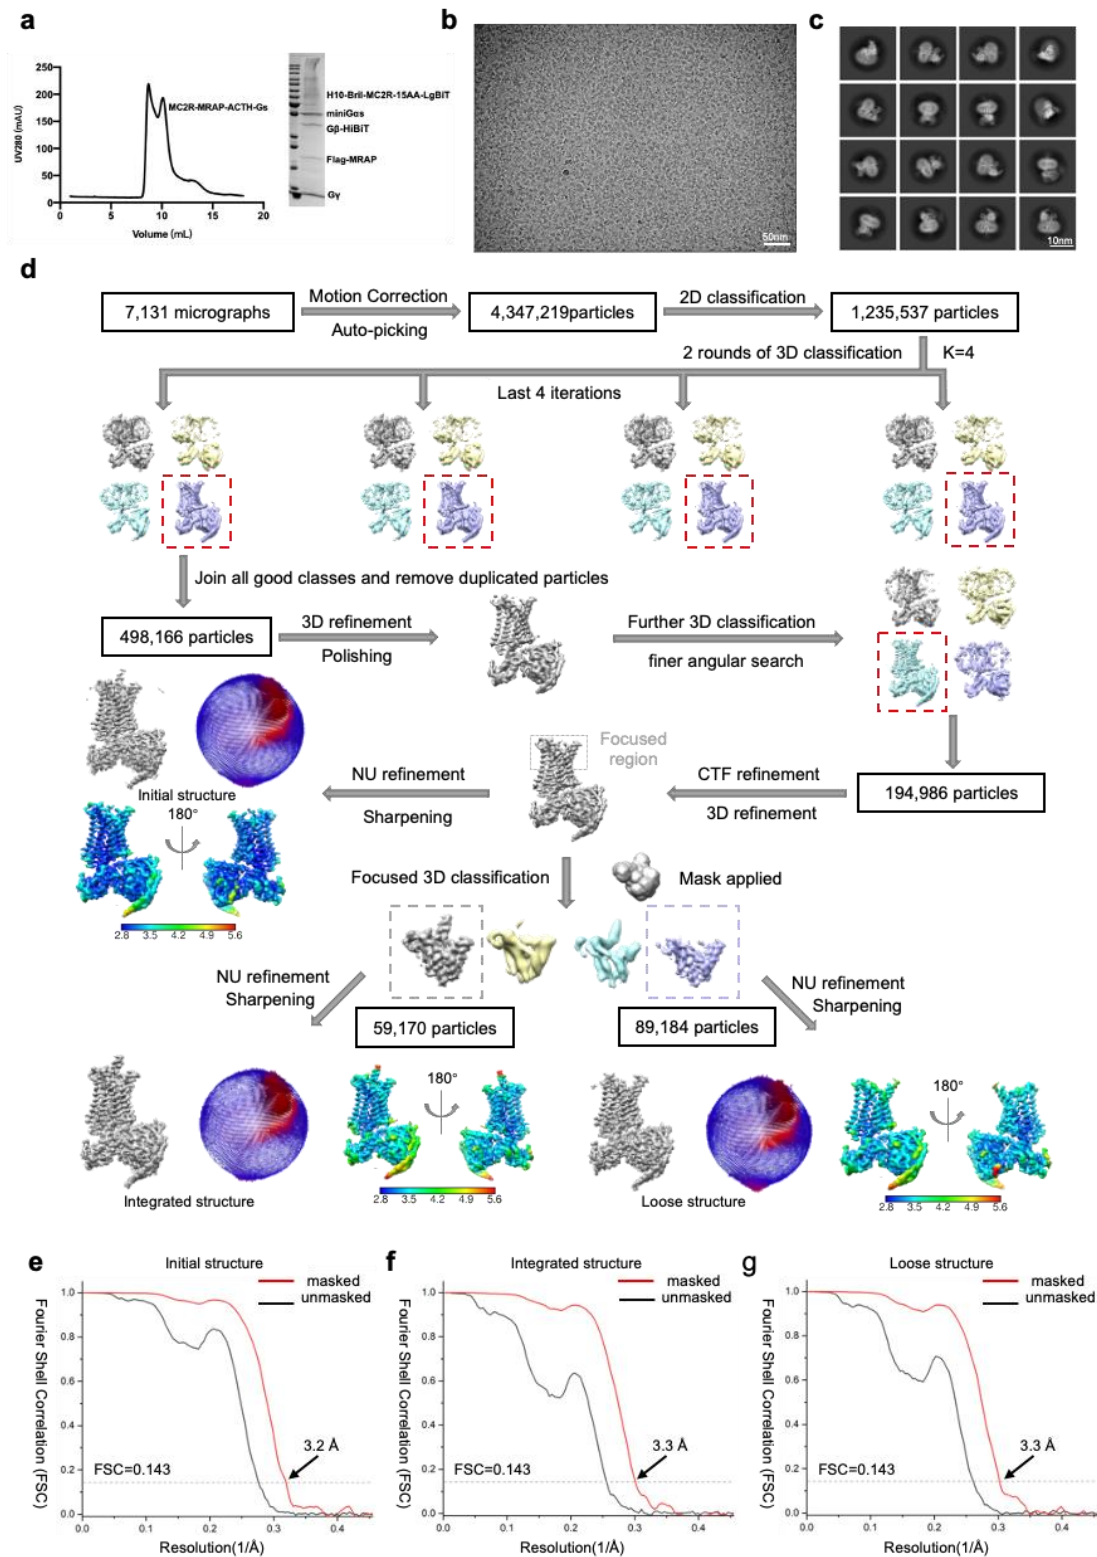

**Supplementary information, Fig. S1** Cryo-EM structure determination of the ACTH-MC2R-G<sub>s</sub>-MRAP1 complex. **a**. The size-exclusion chromatography elution profile (left) and SDS-PAGE analysis (right) of the ACTH-MC2R-G<sub>s</sub>-MRAP1 complex. **b**, **c**. Representative cryo-EM micrograph (scale bar: 50 nm) and 2D class averages (scale bar: 10 nm) of the  $\alpha$ -MSH-MC1R-G<sub>s</sub> complex. **d**. The flowchart of the ACTH-MC2R-G<sub>s</sub>-MRAP1 cryo-EM data analysis, the final cryo-

EM map surface is colored to show the local resolution estimated by Cryosparc. **d-f.** FSC curves at 0.143 of the final reconstruction of the initial structure, integrated structure and loose structure of the ACTH-MC2R-G<sub>s</sub>-MRAP1 complex, unmasked (black) or masked (red).
