# Supplementary material
Source: PubMed Central journal article supplement (PMC9810661)
Supplement: 41422_2022_751_MOESM2_ESM.pdf [file 41422_2022_751_MOESM2_ESM.pdf]

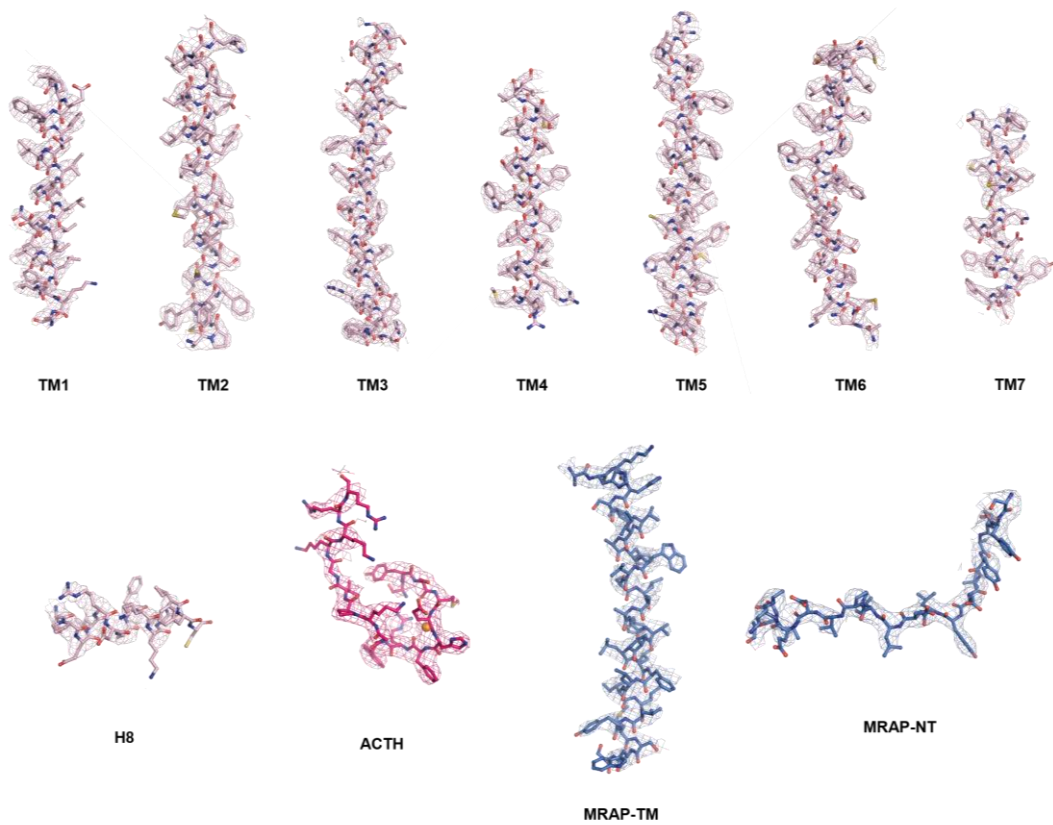

**Supplementary information, Fig. S2** Representative segments of model and cryo-EM density. Model segments with corresponding map density of transmembrane helices and helix 8 of MC2R; ACTH and calcium ion; transmembrane helix and N-terminus of MRAP1. All the cryo-EM densities are shown in PyMOL and contoured at 6 sigma.
