# Supplementary material
Source: PubMed Central journal article supplement (PMC9810661)
Supplement: 41422_2022_751_MOESM3_ESM.pdf [file 41422_2022_751_MOESM3_ESM.pdf]

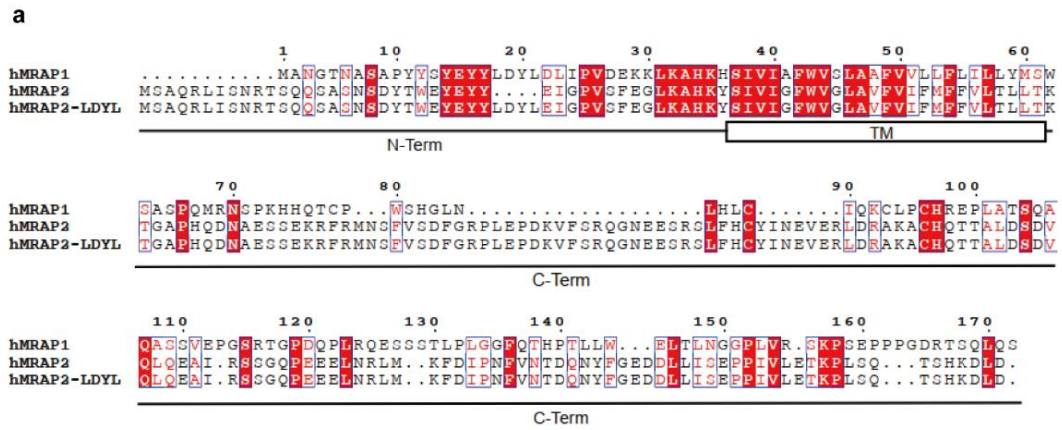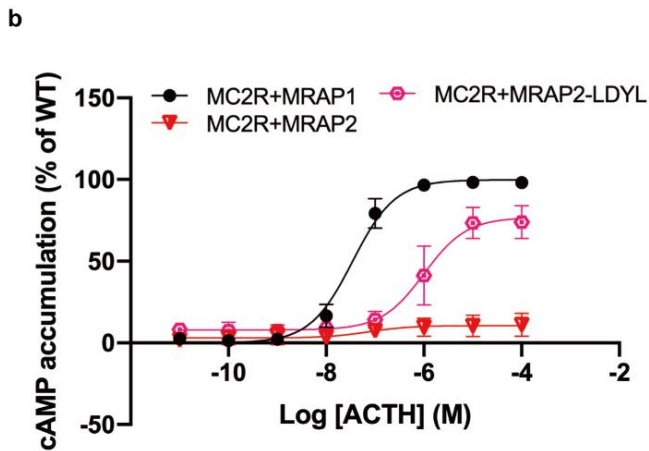

**Supplementary information, Fig. S3 Human MRAP2 lacks the key amino acids LDYL. a.** Sequence alignment of the human MRAP1 and MRAP2. **b.** cAMP responses in HEK293T cells co-expressing MC2R and MRAP1, MRAP2 or MRAP2 inserted with LDYL.
