# Supplementary material
Source: PubMed Central journal article supplement (PMC9810661)
Supplement: 41422_2022_751_MOESM4_ESM.pdf [file 41422_2022_751_MOESM4_ESM.pdf]

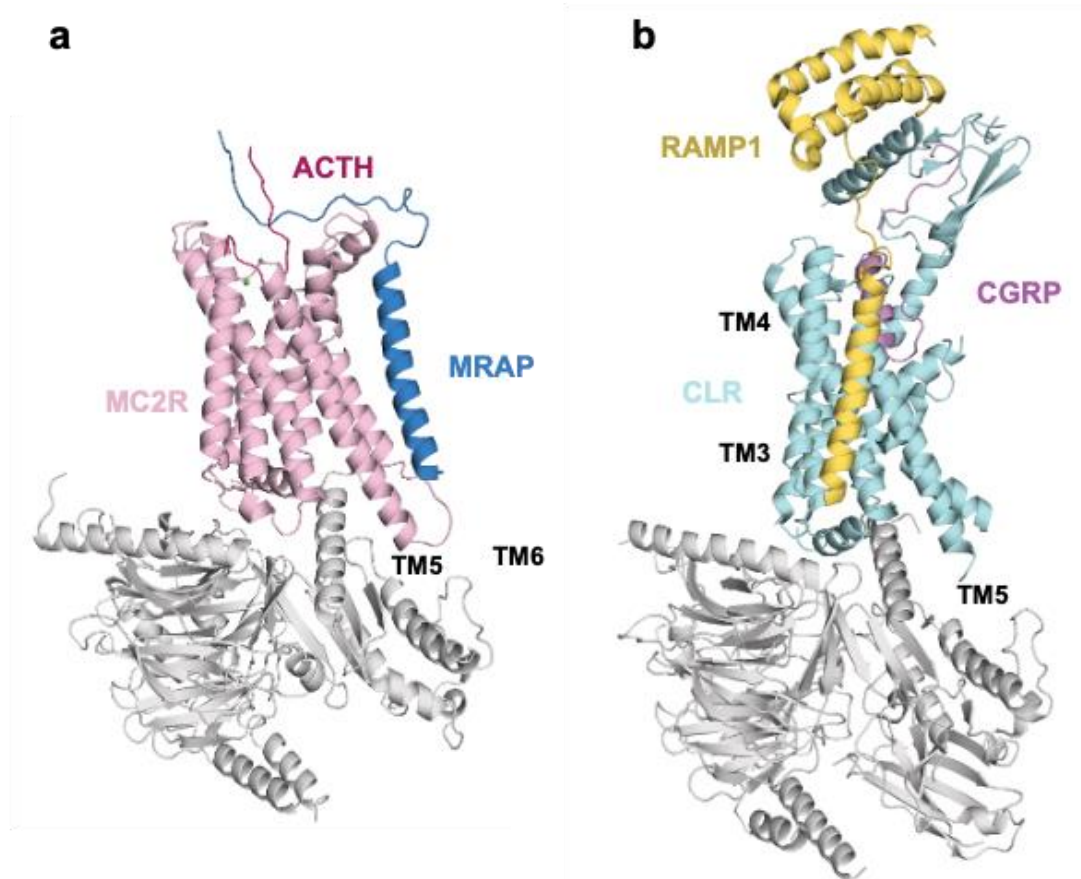

**Supplementary information, Fig. S4** Structural comparison between a sample GPCR with accessory protein MRAP1 and RAMP1 (PDB code: 6E3Y). **a.** The structure of the MRAP1-MC2R-ACTH-G<sub>s</sub> complex. MRAP1 interacts with TM5 and TM6 of MC2R, binds and stabilizes ACTH. **b.** The structure of RAMP1-CLR-CGRP-G<sub>s</sub> complex. RAMP1 interacts with TM3, TM4 and TM5 of CLR, binds and stabilizes CRGP. MRAP1 and RAMP1 are highlighted in blue and yellow, respectively, and both show that the N-terminus is extracellular and single-pass transmembrane.
