# Supplementary material
Source: PubMed Central journal article supplement (PMC9810661)
Supplement: 41422_2022_751_MOESM6_ESM.pdf [file 41422_2022_751_MOESM6_ESM.pdf]

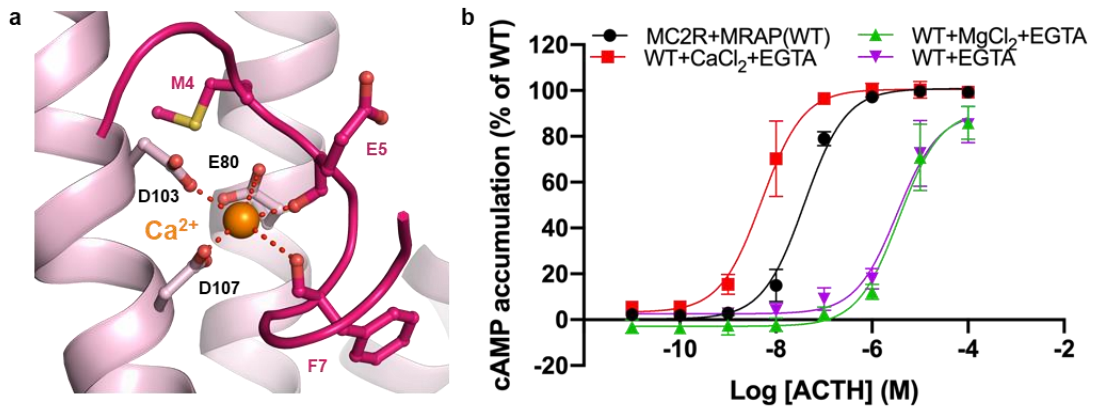

**Supplementary information, Fig. S6**  $\text{Ca}^{2+}$  enhances the interaction between ACTH and MC2R. **a.** Detailed interaction made by  $\text{Ca}^{2+}$  to ACTH and MC2R. **b.** cAMP signaling mediated by MC2R with different ion supplement.
