# Supplementary material
Source: PubMed Central journal article supplement (PMC9810661)
Supplement: 41422_2022_751_MOESM7_ESM.pdf [file 41422_2022_751_MOESM7_ESM.pdf]

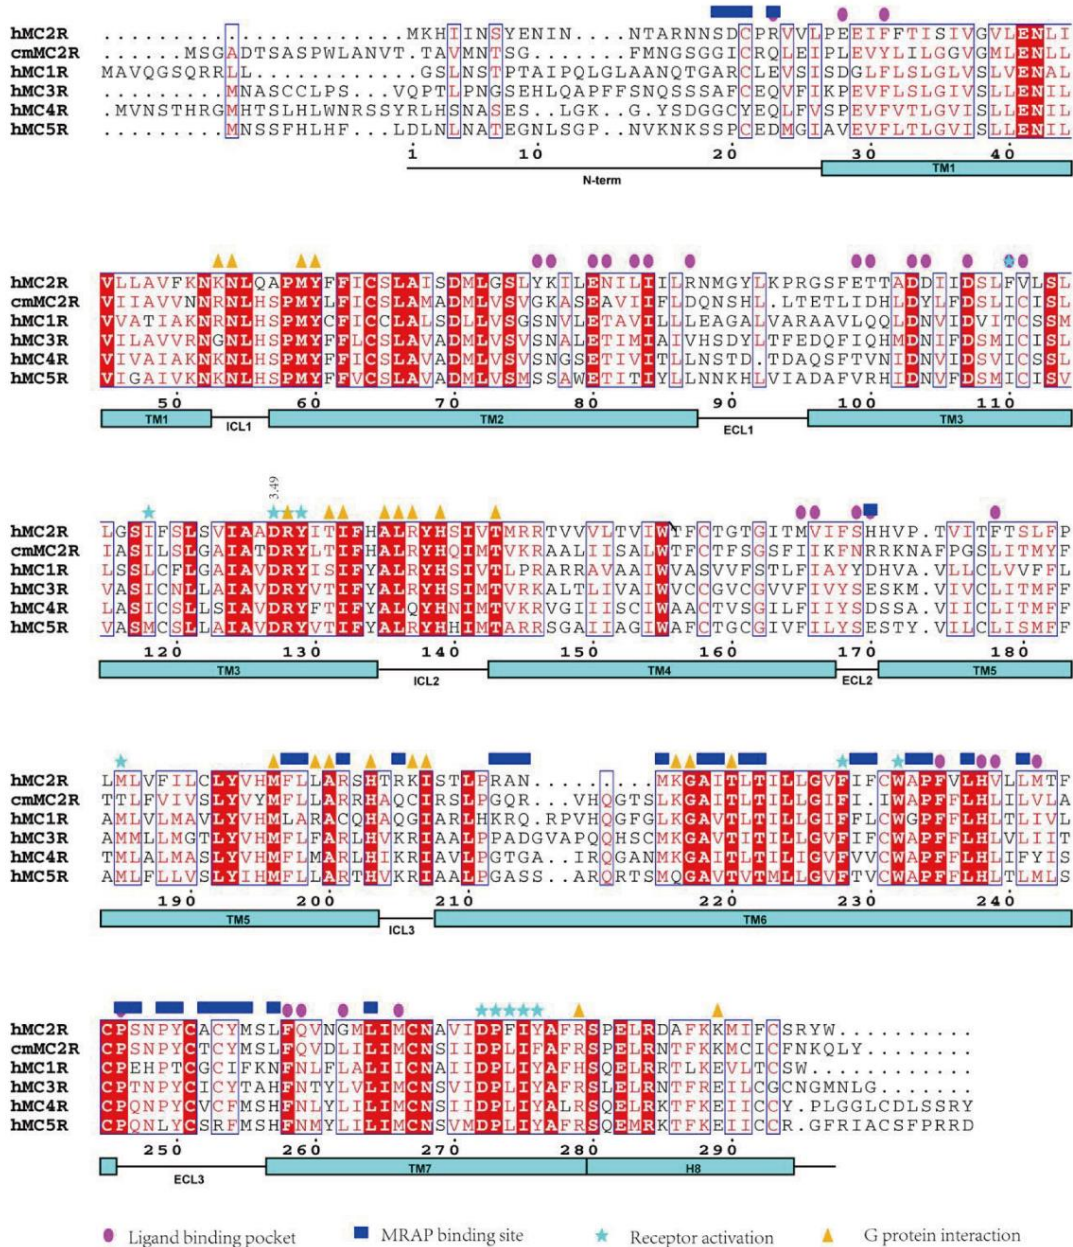

Supplementary information, Fig. S7 Sequence alignment of human MCRs. The interacting residues are shown as indicated.
