# Supplementary material
Source: PubMed Central journal article supplement (PMC9810661)
Supplement: 41422_2022_751_MOESM8_ESM.pdf [file 41422_2022_751_MOESM8_ESM.pdf]

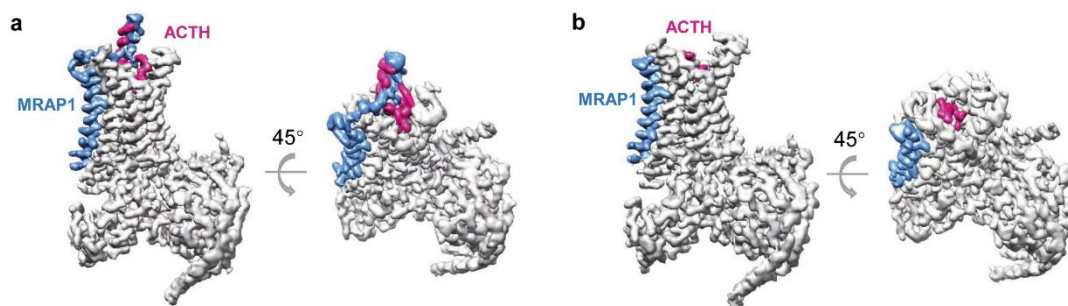

**Supplementary information, Fig. S8** Representation of densities of two states after focused 3D classification. **a.** Density of the integrated ACTH-MC2R-G<sub>s</sub>-MRAP1 structure in two different views. **b.** Density of the loose ACTH-MC2R-G<sub>s</sub>-MRAP1 structure in two different views. Deep pink color shows the ACTH density in (a) or presumable ACTH density in (b), blue color shows the MRAP1 density in both maps.
