# Supplementary material
Source: PubMed Central journal article supplement (PMC9810661)
Supplement: 41422_2022_751_MOESM9_ESM.pdf [file 41422_2022_751_MOESM9_ESM.pdf]

**Table S1. Cryo-EM data collection, model refinement, and validation statistics****ACTH-MC2R-G<sub>s</sub>-MRAP1**

---

| <b>Data collection</b>                                |                  |
|-------------------------------------------------------|------------------|
| Voltage (kV)                                          | 300              |
| Magnification                                         | 81,000 x         |
| Pixel size (Å)                                        | 1.04             |
| Total electron dose (e <sup>-</sup> /Å <sup>2</sup> ) | 50               |
| Defocus range (μm)                                    | -0.5~-3.0        |
| Micrographs collected                                 | 7,131            |
| <b>3D reconstruction</b>                              |                  |
| Total extracted particles                             | 4,347,219        |
| Particles for final 3D reconstruction                 | 59,170           |
| Symmetry imposed                                      | C1               |
| Resolution range (Å)                                  | 2.86-10.45       |
| Map resolution (Å) (FSC=0.143)                        | 3.35             |
| <b>Refinement and validation</b>                      |                  |
| Model resolution (Å) (FSC=0.5)                        | 3.30             |
| Model composition                                     |                  |
| Non-hydrogen atoms                                    | 7,670            |
| Protein residues                                      | 968              |
| Map-model CC                                          | 0.77             |
| B factors (Å <sup>2</sup> )                           | 30-137           |
| R.M.S deviations                                      |                  |
| Bonds lengths (Å)                                     | 0.004            |
| Bonds angles (°)                                      | 0.756            |
| MolProbity score                                      | 1.86             |
| Clash score                                           | 10.37            |
| Rotamer outliers (%)                                  | 0.96             |
| Cβ outliers (%)                                       | 0.22             |
| CaBLAM outliers (%)                                   | 2.98             |
| Ramachandran plot statistics                          |                  |
| Preferred (%)                                         | 95.39            |
| Allowed (%)                                           | 4.61             |
| Outlier (%)                                           | 0.00             |
| <b>PDB accession number</b>                           | <b>8GY7</b>      |
| <b>EMDB accession number</b>                          | <b>EMD-34371</b> |

---
