# Supplementary material
Source: PubMed Central journal article supplement (PMC9810661)
Supplement: 41422_2022_751_MOESM10_ESM.pdf [file 41422_2022_751_MOESM10_ESM.pdf]

**Table S2. ACTH<sub>(1-39)</sub>-induced cAMP responses at MC2R, MRAP1 or MRAP2 mutants.**

cAMP accumulation was normalized to the maximum response of wild-type (WT). Dose-response curves were analyzed using a three-parameter logistic equation to obtain  $pEC_{50}$  values. Cell surface expression was assessed by FACS. Values were normalized to the wild-type construct (WT, shown as percentage). All the mutant constructs were modified by single-point mutation in the setting of the WT construct. The experiments were carried out independently at least three times. Data shown are means  $\pm$  S.E.M. One-way ANOVA were used to determine statistical difference. N.D., values that could not be determined due to incomplete curve fits. \* $P < 0.05$ , \*\* $P < 0.01$ , \*\*\* $P < 0.001$ .

| Mutants                            | $pEC_{50} \pm$ S.E.M. | $E_{max} \pm$ S.E.M.<br>(% WT) | Cell surface expression<br>(% MC2R (WT) +<br>MRAPs (WT)) |
|------------------------------------|-----------------------|--------------------------------|----------------------------------------------------------|
| MC2R (WT) +<br>MRAP (WT)           | 7.46 $\pm$ 0.03       | 100.00 $\pm$ 0.76              | 100.00                                                   |
| <b>MRAP1 (WT) + MC2R (mutants)</b> |                       |                                |                                                          |
| S19A                               | 6.37 $\pm$ 0.05***    | 100.10 $\pm$ 2.14              | 134.36 $\pm$ 14.69                                       |
| D20A                               | 7.40 $\pm$ 0.07       | 98.90 $\pm$ 1.87               | 105.55 $\pm$ 4.57                                        |
| R23A                               | 7.37 $\pm$ 0.08       | 100.51 $\pm$ 2.40              | 110.88 $\pm$ 23.88                                       |
| R23E                               | 8.17 $\pm$ 0.07**     | 97.46 $\pm$ 1.59               | 119.74 $\pm$ 7.87                                        |
| E28A                               | 6.57 $\pm$ 0.10**     | 102.87 $\pm$ 3.37              | 94.38 $\pm$ 11.26                                        |
| F31A                               | 6.37 $\pm$ 0.09***    | 100.31 $\pm$ 3.32              | 111.63 $\pm$ 15.48                                       |
| Y76A                               | 6.62 $\pm$ 0.08**     | 99.80 $\pm$ 2.87               | 120.93 $\pm$ 12.78                                       |
| K77A                               | 5.69 $\pm$ 0.06***    | 97.58 $\pm$ 2.41               | 128.40 $\pm$ 19.40                                       |
| E80A                               | N.D.                  | N.D.                           | 89.97 $\pm$ 13.87                                        |
| N81A                               | 6.11 $\pm$ 0.06***    | 99.42 $\pm$ 2.44               | 97.85 $\pm$ 10.03                                        |
| I84A                               | 5.21 $\pm$ 0.19***    | 48.17 $\pm$ 4.43               | 112.18 $\pm$ 15.16                                       |
| R87A                               | 7.57 $\pm$ 0.07       | 99.97 $\pm$ 1.99               | 146.72 $\pm$ 9.23                                        |
| E99A                               | 6.83 $\pm$ 0.10       | 92.01 $\pm$ 3.12               | 94.41 $\pm$ 31.09                                        |
| T100A                              | 7.42 $\pm$ 0.06       | 98.29 $\pm$ 1.70               | 120.05 $\pm$ 4.39                                        |
| D103A                              | 5.45 $\pm$ 0.11***    | 89.29 $\pm$ 4.66               | 158.94 $\pm$ 15.51                                       |
| D104A                              | 5.53 $\pm$ 0.08***    | 100.36 $\pm$ 3.67              | 92.75 $\pm$ 7.24                                         |
| D107A                              | N.D.                  | N.D.                           | 113.91 $\pm$ 14.75                                       |
| F110A                              | 4.56 $\pm$ 0.16***    | 45.46 $\pm$ 4.53               | 140.89 $\pm$ 20.20                                       |
| F110I                              | N.D.                  | N.D.                           | 115.08 $\pm$ 15.25                                       |
| F110A/G262L                        | 5.44 $\pm$ 0.08***    | 78.89 $\pm$ 2.71               | 117.59 $\pm$ 3.00                                        |
| F110I/G262L                        | N.D.                  | N.D.                           | 98.60 $\pm$ 13.18                                        |
| V111A                              | 6.45 $\pm$ 0.06***    | 103.97 $\pm$ 2.28              | 125.23 $\pm$ 6.44                                        |
| M165A                              | 6.39 $\pm$ 0.06***    | 98.33 $\pm$ 2.16               | 119.58 $\pm$ 11.94                                       |
| V166A                              | 6.61 $\pm$ 0.08**     | 102.55 $\pm$ 2.68              | 97.12 $\pm$ 7.30                                         |
| S169A                              | 5.66 $\pm$ 0.07***    | 104.62 $\pm$ 3.17              | 91.19 $\pm$ 4.55                                         |
| H170A                              | 5.53 $\pm$ 0.09***    | 101.69 $\pm$ 4.07              | 133.08 $\pm$ 11.42                                       |
| F178A                              | 5.13 $\pm$ 0.07***    | 93.39 $\pm$ 3.50               | 131.71 $\pm$ 20.49                                       |

|                                    |                |               |                |
|------------------------------------|----------------|---------------|----------------|
| F197A                              | 5.70 ± 0.07*** | 96.04 ± 2.98  | 133.85 ± 1.40  |
| R201A                              | 7.32 ± 0.06    | 97.95 ± 1.65  | 116.43 ± 17.80 |
| R205A                              | 7.20 ± 0.08    | 100.02 ± 2.62 | 105.42 ± 22.80 |
| N214A                              | 6.52 ± 0.07    | 98.33 ± 2.28  | 114.20 ± 15.39 |
| M215A                              | 7.51 ± 0.07    | 103.64 ± 2.17 | 134.72 ± 20.33 |
| L221A                              | 7.16 ± 0.05    | 103.64 ± 2.17 | 122.50 ± 22.30 |
| F230A                              | 7.49 ± 0.07    | 102.04 ± 2.12 | 123.88 ± 8.56  |
| P234A                              | 6.52 ± 0.07*   | 97.87 ± 2.47  | 158.06 ± 17.38 |
| F235A                              | 4.55 ± 0.17*** | 75.50 ± 8.07  | 143.69 ± 9.20  |
| L237A                              | 6.93 ± 0.06    | 101.81 ± 1.94 | 95.10 ± 16.08  |
| H238A                              | 6.44 ± 0.06*** | 99.06 ± 2.18  | 152.51 ± 12.19 |
| V239A                              | 6.52 ± 0.06**  | 101.89 ± 2.29 | 140.15 ± 7.48  |
| L241A                              | 6.91 ± 0.06*** | 102.34 ± 2.23 | 102.42 ± 9.32  |
| M242A                              | 6.41 ± 0.07*** | 101.81 ± 2.62 | 161.76 ± 13.09 |
| Y250A                              | 5.65 ± 0.09*** | 92.25 ± 3.73  | 101.53 ± 9.93  |
| C251A                              | 6.35 ± 0.08*** | 100.65 ± 2.76 | 112.06 ± 9.91  |
| Y254A                              | 6.25 ± 0.08*** | 98.01 ± 2.94  | 111.67 ± 8.74  |
| M255A                              | 6.38 ± 0.06*** | 98.03 ± 2.13  | 129.79 ± 10.91 |
| L257A                              | 6.72 ± 0.07    | 101.88 ± 2.34 | 103.24 ± 1.57  |
| F258A                              | 5.01 ± 0.06*** | 84.02 ± 2.91  | 148.80 ± 6.40  |
| G262L                              | N.D.           | N.D.          | 137.01 ± 9.34  |
| L264A                              | 6.49 ± 0.09**  | 97.71 ± 3.33  | 132.37 ± 18.94 |
| M266A                              | 5.98 ± 0.06*** | 107.77 ± 2.47 | 131.17 ± 17.36 |
| F274A                              | 6.79 ± 0.09    | 88.48 ± 3.04  | 113.13 ± 4.46  |
| D285A                              | 7.61 ± 0.04    | 99.25 ± 1.14  | 127.04 ± 17.48 |
| <b>MC2R (WT) + MRAP1 (mutants)</b> |                |               |                |
| E15A                               | 6.46 ± 0.07*** | 102.91 ± 2.50 | 46.61 ± 8.39   |
| Y16A                               | 6.28 ± 0.08*** | 102.98 ± 3.47 | 54.85 ± 9.24   |
| Y17A                               | 6.40 ± 0.08*** | 101.73 ± 2.62 | 53.72 ± 5.70   |
| L18A                               | 6.60 ± 0.06**  | 101.83 ± 2.24 | 68.09 ± 8.30   |
| Y20A                               | N.D.           | N.D.          | 70.46 ± 9.45   |
| L21A                               | 6.43 ± 0.07*** | 102.12 ± 2.78 | 65.89 ± 19.25  |
| L23A                               | 7.34 ± 0.07*** | 99.52 ± 1.99  | 12.80 ± 4.23   |
| I24A                               | 7.46 ± 0.08    | 100.03 ± 2.14 | 29.56 ± 6.93   |
| K35A                               | 6.94 ± 0.04    | 100.03 ± 1.50 | 131.59 ± 4.87  |
| H36A                               | 6.95 ± 0.05    | 99.94 ± 1.61  | 126.26 ± 7.86  |
| I38A                               | 6.97 ± 0.07    | 98.29 ± 2.33  | 66.60 ± 7.13   |
| W43A                               | 7.22 ± 0.07    | 100.03 ± 2.10 | 57.40 ± 2.97   |
| F54A                               | 6.81 ± 0.06    | 100.75 ± 2.16 | 146.37 ± 25.33 |
| L57A                               | 5.64 ± 0.05*** | 95.67 ± 2.20  | 129.23 ± 6.73  |
| L58A                               | 7.07 ± 0.08    | 101.02 ± 2.69 | 116.35 ± 6.28  |
| S61A                               | 6.83 ± 0.08    | 99.99 ± 2.71  | 172.00 ± 13.24 |

|                                    |                |               |               |
|------------------------------------|----------------|---------------|---------------|
| MRAP1 (14-172)                     | 6.25 ± 0.06*** | 100.41 ± 2.61 | 16.32 ± 1.40  |
| MRAP1 (31-172)                     | N.D.           | N.D.          | 14.52 ± 1.50  |
| MRAP1 (1-62)                       | 7.28 ± 0.05    | 99.16 ± 1.46  | 6.89 ± 0.88   |
| <b>MC2R (WT) + MRAP2 (mutants)</b> |                |               |               |
| MRAP2 (WT)                         | N.D.           | N.D.          | 42.69 ± 9.04  |
| MRAP2-LDYL                         | 6.00 ± 0.13*** | 76.95 ± 3.72  | 64.73 ± 30.59 |
